# Supplementary material for: Maintenance of statin use over 3 years following acute coronary syndromes: a national data linkage study (ANZACS-QI-2)
Source: HighWire-hosted journal article supplement (doi:10.1136/heartjnl-2013-304960), 2014-01-16
Supplement: heartjnl-2013-304960supp_appendix1.pdf [file heartjnl-2013-304960supp_appendix1.pdf]

**Appendix 1: ICD-10-AM codes used to define ACS, diabetes mellitus, coronary procedures and previous cardiovascular disease**

| <b>Condition</b>                | <b>Subtypes</b>                             | <b>ICD-10-AM codes</b>                                                                                                                        |
|---------------------------------|---------------------------------------------|-----------------------------------------------------------------------------------------------------------------------------------------------|
| Acute coronary syndrome         | STEMI                                       | [I210-I213,I220,I221,I228,I229                                                                                                                |
|                                 | NSTEMI                                      | I214 and I222                                                                                                                                 |
|                                 | MI unspecified                              | I219                                                                                                                                          |
|                                 | Unstable angina                             | I200                                                                                                                                          |
| Diabetes Mellitus               |                                             | E10-E14, O24.0-O24.3                                                                                                                          |
| Previous cardiovascular disease | Coronary heart disease                      | ACS plus: I20x,I21x,I23x, I24x, I252, I255, I256, I258, I259, I46x                                                                            |
|                                 | Coronary procedure                          | 3530306, 3530400, 3530401, 3530500, 3530501, 3530906-3530909, 353100x, 3863700, 3865308, 3845619, 384970x, 385000x, 385030x, 3850500, 902010x |
|                                 | Heart failure                               | I500, I501, I509                                                                                                                              |
|                                 | Ischaemic stroke                            | I63x, I64x, I66x, I678, I693                                                                                                                  |
|                                 | Atherosclerotic peripheral vascular disease | I65x, I74x, I702, I71x, I739, I74x, E1052, E1152, E1452                                                                                       |
|                                 | Peripheral arterial procedure               | 3270x-3276x, 3305000, 3305500, 3307000, 3307500, 3308000, 3310000-3318100, 335x, 3380000, 3380302, 33806x, 353120x, 353150x, 9023000, 9022900 |
