# Supplementary material for: Maintenance of statin use over 3 years following acute coronary syndromes: a national data linkage study (ANZACS-QI-2)
Source: HighWire-hosted journal article supplement (doi:10.1136/heartjnl-2013-304960), 2014-01-16

**Appendix 2: Figures showing the percentages of people with  $MPR \geq 0.8$  in different demographic and clinical subgroups**

Figure 1: Percentages of people with  $MPR \geq 0.8$  after one year and up to three years post ACS by age group

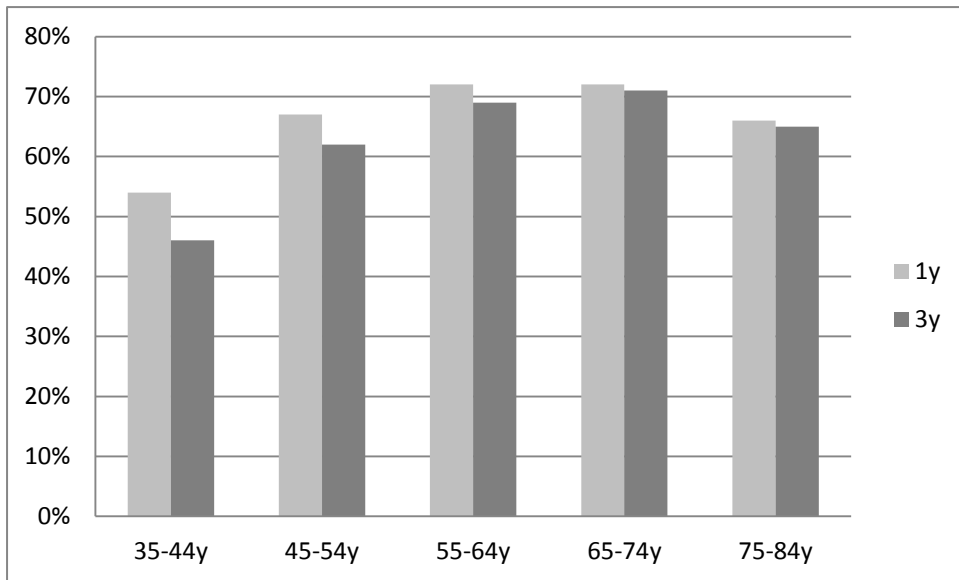

Figure 2: Percentages of people with  $MPR \geq 0.8$  after one year and up to three years post ACS by gender

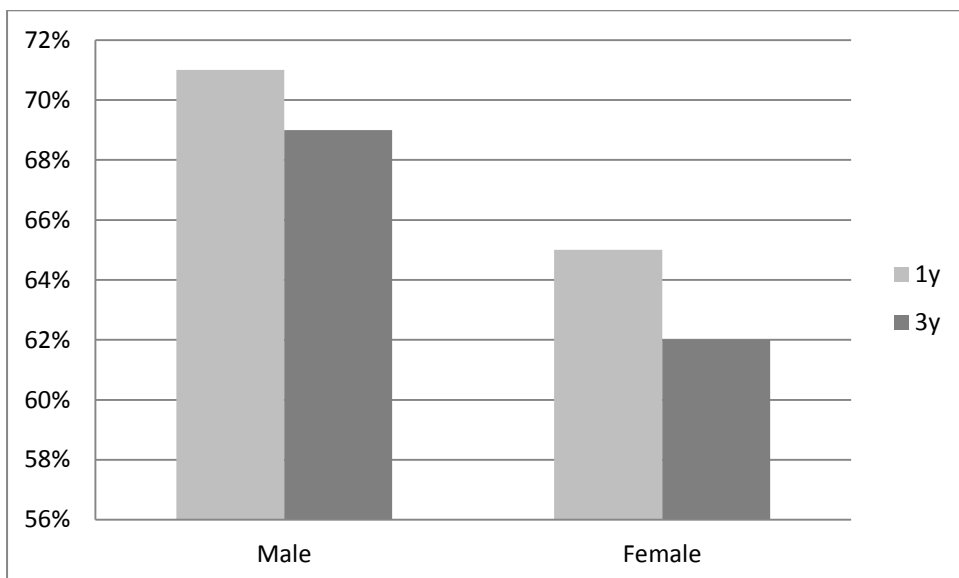

Figure 3: Percentages of people with  $MPR \geq 0.8$  after one year and up to three years post ACS by ethnic group

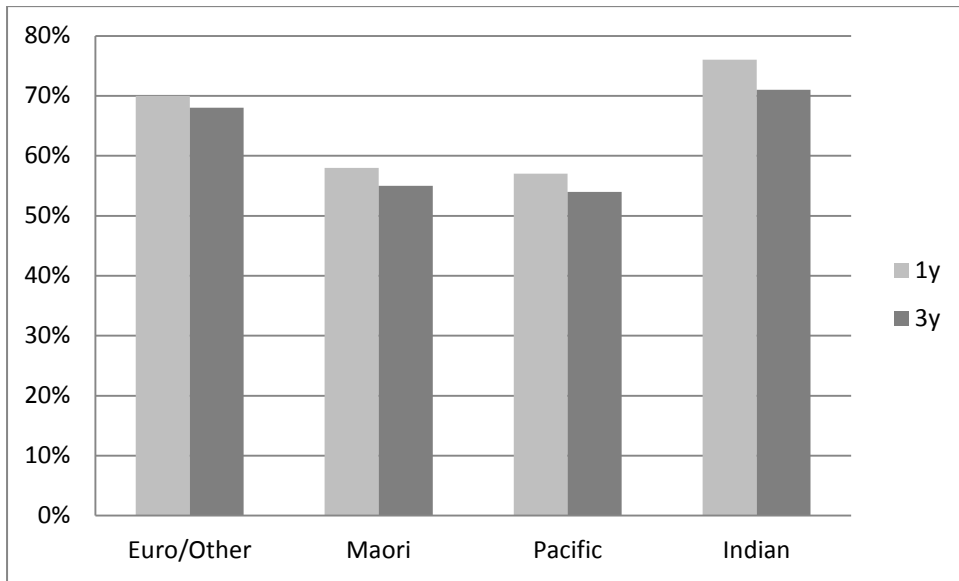

Figure 4: Percentages of people with  $MPR \geq 0.8$  after one year and up to three years post ACS by ACS type

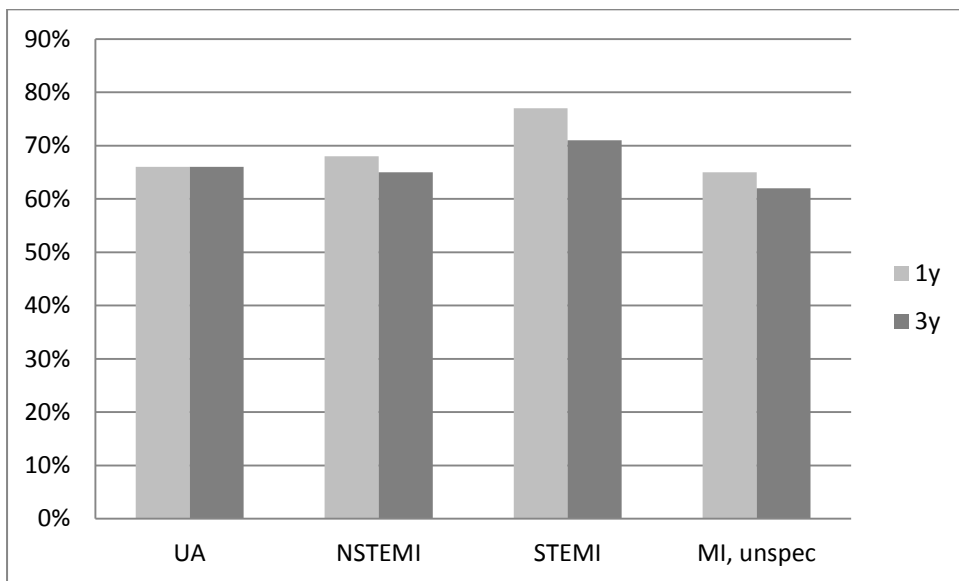

Figure 5: Percentages of people with  $MPR \geq 0.8$  after one year and up to three years post ACS by receipt of coronary procedure within 30 days of admission

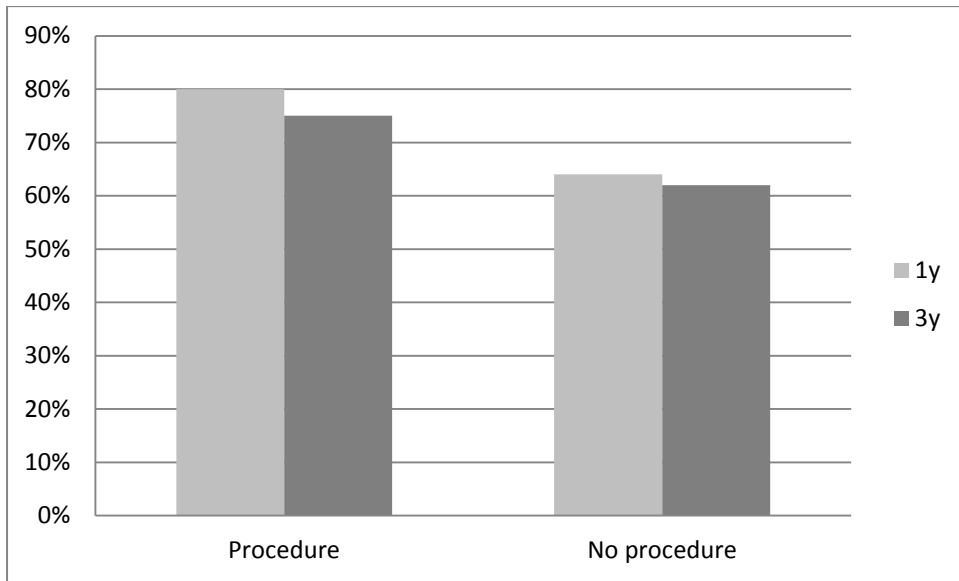

Figure 6: Percentages of people with  $MPR \geq 0.8$  after one year and up to three years post ACS by history of cardiovascular disease

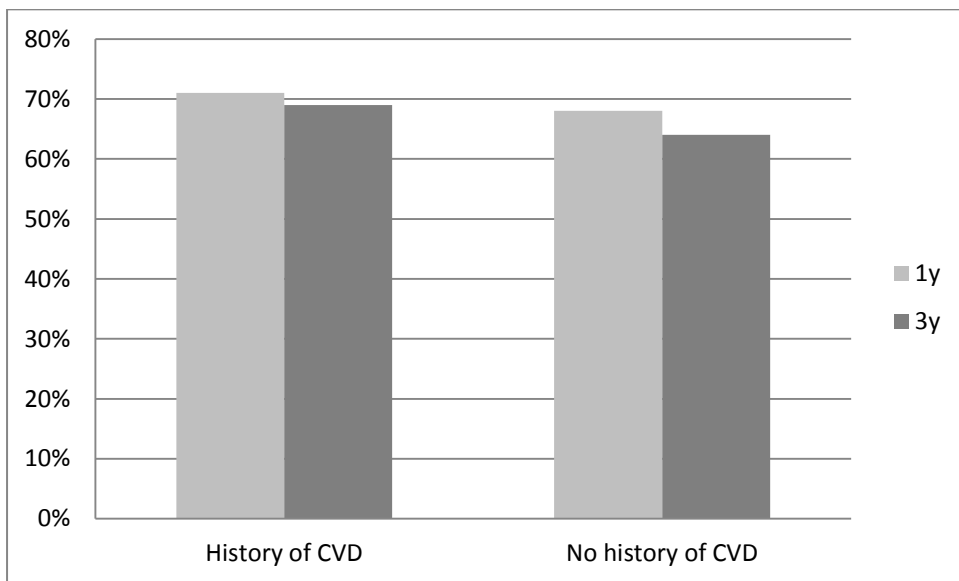

Figure 7: Percentages of people with  $MPR \geq 0.8$  after one year and up to three years post ACS by statin use in the 90 days prior to admission

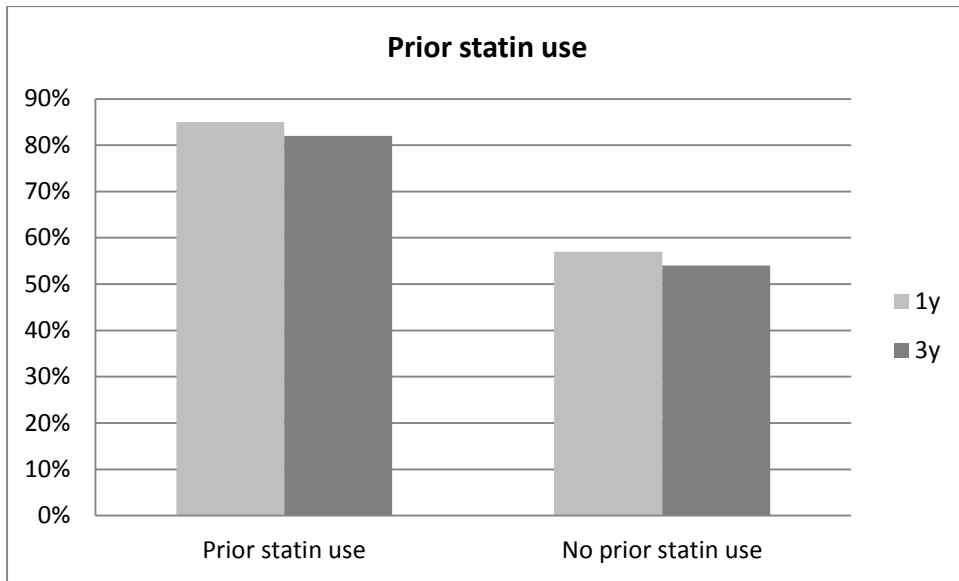

Supplement: heartjnl-2013-304960supp_appendix2.pdf [file heartjnl-2013-304960supp_appendix2.pdf]
